# Supplementary material for: Mechanical behavior of SiNC layers on PDMS: effects of layer thickness, PDMS modulus, and SiNC surface functionality
Source: Royal Society of Chemistry journal article supplement (doi:10.1039/d0ra06321e), 2020-01-01
Supplement: d0ra06321e1.pdf [file d0ra06321e1.pdf]

Cite this: DOI: 10.1039/xxxxxxxxxx

## Electronic Supporting Information: Mechanical behavior of SiNC layers on PDMS: Effects of layer thickness, PDMS modulus, and SiNC surface functionality

Alborz Izadi<sup>‡</sup>, Mayank Sinha<sup>‡</sup>, Cameron Papson, Sara Roccabianca, and Rebecca Anthony\*

Received Date

Accepted Date

DOI: 10.1039/xxxxxxxxxx

www.rsc.org/journalname

Scanning electron microscopy (SEM) paired with focused ion beam (FIB) milling or physical scoring were used to estimate the thicknesses of the SiNC layers. Figure S-1a and b are example images from 5 min. and 30 min. deposition time on PDMS fabricated with  $\alpha = 10$ . For clarity, we also include in Fig. S-1c a top-down photograph of our sample apparatus for estimating the bifurcation onset angle, illuminated by an ultraviolet (UV) flashlight to show the luminescence of the sample (in this case, surface-functionalized SiNCs).

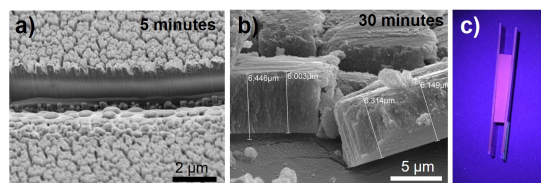

Fig. S-1 SEM imaging was used to estimate the SiNC layer thicknesses. (a) and (b) show example images from depositions of 5 min. and 30 min., respectively. The PDMS was fabricated with  $\alpha = 10$ . (c) shows a top-down photograph of the sample apparatus for testing, with the aluminum handles sandwiching the PDMS/SiNC layer. The surface-functionalized sample was illuminated with a UV flashlight during the photograph, showing its luminescence.

FTIR confirmed the reaction of the SiNCs with alkyl chains for the functionalized samples.

Table S-1 Thickness measurements from SEM cross-sectional imaging for SiNC layers deposited on PDMS with varying  $\alpha$ . Deposition time and standoff distance between the orifice and the PDMS substrate were kept constant

| Ratio of base to curing agent in PDMS, $\alpha$ | Thickness of SiNC film [ $\mu\text{m}$ ] |
|-------------------------------------------------|------------------------------------------|
| 10                                              | $4.56 \pm 0.31$                          |
| 12                                              | $4.41 \pm 0.32$                          |
| 20                                              | $4.31 \pm 0.50$                          |

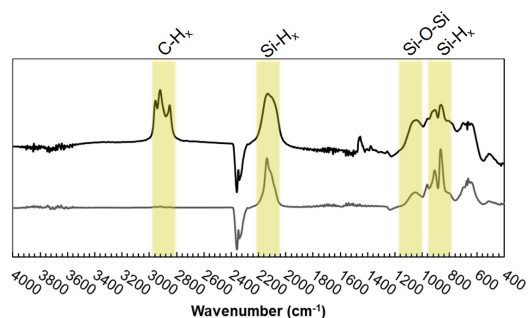

Fig. S-2 Bare SiNCs (bottom trace, in gray) show absorptions for Si-H<sub>x</sub> species, while surface-functionalized SiNCs (top trace, in black) also contain evidence of C-H<sub>x</sub> stretching vibrations near 2900 cm<sup>-1</sup>. Both samples demonstrate a small amount of oxidation in the form of Si-O-Si absorption, which is expected as the FTIR measurements are performed in air.
